# Supplementary material for: QSRR Modeling for Metabolite Standards Analyzed by Two Different Chromatographic Columns Using Multiple Linear Regression
Source: PubMed Central journal article supplement (PMC5372210; doi:10.3390/metabo7010007), 2017-02-09
Supplement: metabolites-07-00007-s001.pdf [file metabolites-07-00007-s001.pdf]

# Supplementary Materials: QSRR Modeling for Metabolite Standards Analyzed by Two Different Chromatographic Columns and Using Multiple Linear Regression

Chrysostomi Zisi, Ioannis Sampsonidis, Stella Fasoula, Konstantinos Papachristos, Michael Witting, Helen G. Gika, Panagiotis Nikitas and Adriani Pappa-Louisi

**Table S1.** 94 metabolites standards used in the first dataset, classified in 7 chemical groups (sugars, aminoacids, acids, nucleonic bases-nucleosides, amides, vitamins and alkaloids), and their retention data obtained under the same elution conditions on two different chromatographic columns.

| Solute No | Chemical Class | Metabolite         | tr(Amide) | tr(Bare Silica) |
|-----------|----------------|--------------------|-----------|-----------------|
| 1         |                | xylose             | 9.07      | 2.56            |
| 2         |                | mannitol           | 12.04     | 4.5             |
| 3         |                | sorbitol           | 12.05     | 4.44            |
| 4         |                | glucose            | 12.19     | 3.7             |
| 5         |                | sucrose            | 13.32     | 8.56            |
| 6         |                | $\beta$ -glucose   | 11.93     | 3.69            |
| 7         | sugars         | raffinose          | 15        | 11.31           |
| 8         |                | lactose            | 13.77     | 10.41           |
| 9         |                | maltose            | 13.75     | 9.79            |
| 10        |                | melezitose         | 14.71     | 11.28           |
| 11        |                | arabitol           | 10.3      | 3.46            |
| 12        |                | fructose           | 11.2      | 3.25            |
| 13        |                | galactose          | 12.22     | 3.71            |
| 14        |                | L-glutamic acid    | 13.72     | 12              |
| 15        |                | ornithine          | 15.37     | 13.49           |
| 16        |                | methionine         | 11.98     | 11.2            |
| 17        |                | glutathione        | 14.34     | 12.58           |
| 18        |                | L-serine           | 13.7      | 11.66           |
| 19        |                | L-citrulline       | 13.91     | 12.38           |
| 20        |                | L-threonine        | 13.21     | 11.55           |
| 21        |                | acetyl-L-carnitine | 11.74     | 12.22           |
| 22        |                | cycloleucine       | 12.25     | 11.31           |
| 23        |                | glycine            | 13.27     | 11.69           |
| 24        |                | arginine           | 15.06     | 13.36           |
| 25        |                | L-tryptophan       | 11.42     | 10.77           |
| 26        |                | cystine            | 16.58     | 14.26           |
| 27        |                | L-phenylalanine    | 11.41     | 10.87           |
| 28        | aminoacids     | L-tyrosine         | 12.22     | 11.12           |
| 29        |                | L-valine           | 12.25     | 11.29           |
| 30        |                | aspartic acid      | 15        | 13.84           |
| 31        |                | aminoadipic acid   | 13.35     | 11.83           |
| 32        |                | caprine            | 11.45     | 10.99           |
| 33        |                | norvaline          | 12.1      | 11.32           |
| 34        |                | L-isoleucine       | 11.74     | 11.16           |
| 35        |                | glycocoyamine      | 13.05     | 11.75           |
| 36        |                | proline            | 12.23     | 11.51           |
| 37        |                | 1 methylhistidine  | 15.05     | 14.22           |
| 38        |                | alanine            | 12.93     | 11.57           |
| 39        |                | L-asparagine       | 13.79     | 11.99           |
| 40        |                | 3,methylhistidine  | 15.07     | 14.25           |
| 41        |                | L-glutamine        | 13.57     | 11.96           |
| 42        |                | L-histidine        | 15.61     | 15.09           |

|    |                             |                                        |       |       |
|----|-----------------------------|----------------------------------------|-------|-------|
| 43 |                             | $\beta$ alanine                        | 12.87 | 11.95 |
| 44 |                             | lysine                                 | 15.28 | 13.66 |
| 45 |                             | leucine                                | 11.55 | 11.03 |
| 46 |                             | sarcosine                              | 12.7  | 11.66 |
| 47 |                             | indole-3-acetic acid                   | 1.63  | 1.7   |
| 48 |                             | D-galacturonic acid                    | 14.12 | 12    |
| 49 |                             | glyceric acid                          | 12.28 | 11.34 |
| 50 |                             | O-coumaric acid                        | 1.87  | 1.7   |
| 51 |                             | 2-hydroxyisovaleric acid               | 2.52  | 3.71  |
| 52 |                             | m-coumaric acid                        | 1.88  | 1.81  |
| 53 |                             | salicylic                              | 1.92  | 1.83  |
| 54 |                             | P-hydroxybenzoic acid                  | 1.91  | 1.74  |
| 55 |                             | hippuric acid                          | 3.72  | 4.43  |
| 56 |                             | 3,4 dihydroxyphenylacetic acid         | 2.69  | 2.05  |
| 57 | acids                       | hypotaurine                            | 12.86 | 11.66 |
| 58 |                             | lactic acid                            | 4.75  | 5.15  |
| 59 |                             | hydroxyphenyllactic acid               | 4.39  | 4.15  |
| 60 |                             | (2S)-2-amino-3,3-dimethylbutanoic acid | 11.79 | 11.14 |
| 61 |                             | acetionate                             | 3.18  | 5.21  |
| 62 |                             | ferulic acid                           | 1.82  | 1.79  |
| 63 |                             | kynurenate                             | 10.69 | 9.12  |
| 64 |                             | D-glucuronic acid                      | 14.05 | 11.84 |
| 65 |                             | hydroxycinnamic acid                   | 1.9   | 1.75  |
| 66 |                             | deoxycholic acid                       | 1.94  | 1.85  |
| 67 |                             | levulinic acid                         | 1.87  | 1.97  |
| 68 |                             | thymidine                              | 3.4   | 2.13  |
| 69 |                             | guanine                                | 10.76 | 5.82  |
| 70 |                             | adenosine                              | 6.83  | 3.83  |
| 71 |                             | xanthine                               | 9.12  | 2.64  |
| 72 |                             | cytosine                               | 9.68  | 6.27  |
| 73 |                             | cytidine                               | 11.06 | 6.15  |
| 74 | nucleonic bases-nucleosides | hypoxanthine                           | 6.54  | 3.51  |
| 75 |                             | (-)-inosine                            | 10.25 | 3.89  |
| 76 |                             | creatinine                             | 7.06  | 6.31  |
| 77 |                             | adenine                                | 6.11  | 4.82  |
| 78 |                             | thymine                                | 2.69  | 1.92  |
| 79 |                             | guanosine                              | 11.56 | 5.62  |
| 80 |                             | uridine                                | 6.37  | 2.34  |
| 81 |                             | 2-deoxyadenosine                       | 5.02  | 4.05  |
| 82 |                             | (+)-pantothenic acid                   | 4.01  | 3.49  |
| 83 |                             | biotin                                 | 3.58  | 3.18  |
| 84 |                             | riboflavin                             | 10.45 | 3.73  |
| 85 | vitamins                    | pyridoxine                             | 4.71  | 3.61  |
| 86 |                             | niacin                                 | 5.24  | 6.28  |
| 87 |                             | Vitamin B12                            | 13.62 | 14.8  |
| 88 |                             | thiamine                               | 11.56 | 12.44 |
| 89 |                             | theobromine                            | 2.26  | 2.12  |
| 90 | alcaloids                   | tomatidine                             | 3.77  | 5     |
| 91 |                             | tryptamine                             | 8.01  | 8.95  |
| 92 |                             | N'methylnicotinamide                   | 2     | 2.33  |
| 93 | amides                      | Alanylglutamine                        | 14.15 | 12.59 |
| 94 |                             | nicotinamide                           | 2.28  | 2.34  |

**Table S2.** Gradient program applied for the LC-MS analysis of 94 standard metabolites.

| Time (min) | A%  | B%  |
|------------|-----|-----|
| 0.00       | 100 | 0   |
| 4.00       | 100 | 0   |
| 20.00      | 0   | 100 |
| 22.00      | 0   | 100 |
| 22.01      | 100 | 0   |
| 30.00      | 100 | 0   |

**Table S3.** Solutes of the second dataset (tryptophan and its major metabolites) and their retention data obtained under four elution conditions on two different chromatographic columns.

| No | Solute                               | EVO    |       |        |        | Gemini |        |        |        |
|----|--------------------------------------|--------|-------|--------|--------|--------|--------|--------|--------|
|    |                                      | Exp1   | Exp2  | Exp3   | Exp4   | Exp1   | Exp2   | Exp3   | Exp4   |
| 1  | L-kynurenin (KYN)                    | 4.722  | 3.554 | 4.719  | 2.909  | 6.476  | 4.903  | 6.338  | 3.874  |
| 2  | 5-hydroxytryptamine (serotonin) (HT) | 4.873  | 3.247 | 5.292  | 3.534  | 6.763  | 4.460  | 7.294  | 4.573  |
| 3  | 5-hydroxytryptophan (HTRP)           | 5.338  | 3.569 | 5.157  | 2.607  | 6.763  | 4.646  | 6.512  | 3.388  |
| 4  | 3-hydroxyanthranilic acid (HANA)     | 5.559  | 3.997 | 5.710  | 4.702  | 8.157  | 6.122  | 6.794  | 5.827  |
| 5  | Tryptophan (TRP)                     | 9.224  | 6.727 | 8.533  | 4.878  | 12.299 | 8.579  | 11.549 | 6.518  |
| 6  | Anthranilic acid (ANA)               | 9.959  | 9.028 | 7.472  | 11.955 | 11.342 | 10.284 | 8.713  | 13.639 |
| 7  | 5-hydroxyindole acetic acid (HIAA)   | 10.073 | 8.580 | 7.670  | 7.900  | 11.312 | 9.686  | 9.049  | 9.226  |
| 8  | Kynurenic acid (KYNA)                | 12.127 | 7.890 | 11.040 | 5.478  | 16.930 | 10.440 | 14.287 | 8.061  |

**Table S4.** Elution conditions applied for the HPLC analysis of tryptophan and its metabolites.

|                  | Exp1  | Exp2 | Exp3 | Exp4 |
|------------------|-------|------|------|------|
| $\phi_{in}$      | 0.025 | 0.05 | 0.02 | 0.05 |
| $\phi_1$         | 0.025 | 0.05 | 0.03 | -    |
| $\phi_2$         | -     | -    | 0.1  | -    |
| pH <sub>in</sub> | 2     | 2    | 2    | 4    |
| pH <sub>1</sub>  | 11.4  | 11.4 | 7.6  | -    |
| pH <sub>2</sub>  | -     | -    | 11.4 | -    |
| t <sub>in</sub>  | 0     | 0    | 0.2  | -    |
| t <sub>1</sub>   | 20    | 20   | 9.5  | -    |
| t <sub>2</sub>   | -     | -    | 18   | -    |

$\phi$  is the volume fraction of acetonitrile in the mobile phase.

**Table S5.** 309 MDs calculated from RDKit toolkit and RCDK software.

|                                                                                                                                                                                                                                                                                                                                                                                                                                                                                                                                                                                                                                                                                                                                                                                                                                                                                                                                                                                                                                                                                                                                                                                                                                                                                                                                                                                                                                                                                                                                                                                                                                                                                                                                                                                                                                                                                                                                                                                                                                                                                                                                                                                                                                                                                                                                                                                                                                                                                                                                                                                                                                                                                                                                                                                                                                                                                                                                                                                                                                                                                                                                                                                                                                                                                                                                        |
|----------------------------------------------------------------------------------------------------------------------------------------------------------------------------------------------------------------------------------------------------------------------------------------------------------------------------------------------------------------------------------------------------------------------------------------------------------------------------------------------------------------------------------------------------------------------------------------------------------------------------------------------------------------------------------------------------------------------------------------------------------------------------------------------------------------------------------------------------------------------------------------------------------------------------------------------------------------------------------------------------------------------------------------------------------------------------------------------------------------------------------------------------------------------------------------------------------------------------------------------------------------------------------------------------------------------------------------------------------------------------------------------------------------------------------------------------------------------------------------------------------------------------------------------------------------------------------------------------------------------------------------------------------------------------------------------------------------------------------------------------------------------------------------------------------------------------------------------------------------------------------------------------------------------------------------------------------------------------------------------------------------------------------------------------------------------------------------------------------------------------------------------------------------------------------------------------------------------------------------------------------------------------------------------------------------------------------------------------------------------------------------------------------------------------------------------------------------------------------------------------------------------------------------------------------------------------------------------------------------------------------------------------------------------------------------------------------------------------------------------------------------------------------------------------------------------------------------------------------------------------------------------------------------------------------------------------------------------------------------------------------------------------------------------------------------------------------------------------------------------------------------------------------------------------------------------------------------------------------------------------------------------------------------------------------------------------------------|
| MinAbsPartialCharge, NumRadicalElectrons, HeavyAtomMolWt, MaxAbsEStateIndex, MaxAbs-PartialCharge, MaxEStateIndex, <b>MinPartialCharge</b> , ExactMolWt, MolWt, NumValenceElectrons, MinEStateIndex, MinAbsEStateIndex, MaxPartialCharge, BalabanJ, BertzCT, Chi0, Chi0n, Chi0v, Chi1, Chi1n, Chi1v, Chi2n, Chi2v, Chi3n, Chi3v, Chi4n, Chi4v, HallKierAlpha, Ipc, Kappa1, Kappa2, Kappa3, LabuteASA, PEOE_VSA1, PEOE_VSA10, PEOE_VSA11, PEOE_VSA12, PEOE_VSA13, PEOE_VSA14, PEOE_VSA2, PEOE_VSA3, PEOE_VSA4, PEOE_VSA6, PEOE_VSA7, PEOE_VSA8, PEOE_VSA9, SMR_VSA1, SMR_VSA10, SMR_VSA2, SMR_VSA3, SMR_VSA4, SMR_VSA5, SMR_VSA6, SMR_VSA7, SMR_VSA9, SlogP_VSA1, SlogP_VSA10, SlogP_VSA11, SlogP_VSA12, SlogP_VSA2, SlogP_VSA3, SlogP_VSA4, SlogP_VSA5, SlogP_VSA6, SlogP_VSA8, TPSA, EState_VSA1, EState_VSA10, EState_VSA2, EState_VSA3, EState_VSA4, EState_VSA5, EState_VSA6, EState_VSA7, EState_VSA8, EState_VSA9, VSA_EState10, VSA_EState8, VSA_EState9, FractionCSP3, HeavyAtomCount, NHOHCount, NOCount, NumAliphaticCarbocycles, NumAliphaticHeterocycles, NumAliphatic-Rings, NumAromaticCarbocycles, NumAromaticHeterocycles, NumAromaticRings, NumH-Acceptors, NumHDonors, NumHeteroatoms, NumRotatableBonds, NumSaturatedCarbocycles, NumSaturatedHeterocycles, NumSaturatedRings, RingCount, MolLogP, MolMR, fr_Al_COO, fr_Al_OH, fr_Al_OH_noTert, fr_ArN, fr_Ar_COO, fr_Ar_N, fr_Ar_NH, fr_Ar_OH, fr_COO, fr_COO2, fr_C_O, fr_C_O_noCOO, fr_Imine, fr_NH0, <b>fr_NH1</b> , fr_NH2, fr_N_O, fr_Ndealkylation1, fr_Nhpyrrole, fr_SH, fr_aldehyde, fr_allylic_oxid, fr_amide, fr_aniline, fr_aryl_methyl, fr_benzene, fr_bicyclic, fr_ester, fr_ether, fr_guanido, fr_imidazole, fr_ketone, fr_ketone_Topliss, fr_methoxy, fr_para_hydroxylation, fr_phenol, fr_phenol_noOrthoHbond, fr_phos_acid, fr_phos_ester, fr_piperidine, fr_priamide, fr_pyridine, fr_quatN, fr_sulfide, fr_thiazole, fr_unbrch_alkane, fr_urea, nSmallRings, nAromRings, nRingBlocks, nAromBlocks, nRings5, nRings6, <b>tpsaEfficiency</b> , Zagreb, WPATH, WPOL, WTPT.1, WTPT.2, WTPT.3, WTPT.4, WTPT.5, VAdjMat, TopoPSA, topoShape, PetitjeanNumber, MDEC.11, MDEC.12, MDEC.13, MDEC.14, MDEC.22, MDEC.23, MDEC.24, <b>MDEC.33</b> , MDEC.34, MDEC.44, MDEC.11, MDEC.12, MDEC.22, MDEN.11, MDEN.12, MDEN.13, MDEN.22, MDEN.23, MDEN.33, khs.sCH3, khs.dCH2, khs.ssCH2, khs.dsCH, khs.aaCH, khs.sssCH, khs.dssC, khs.aasC, khs.aaaC, khs.ssssC, <b>khs.sNH2</b> , khs.dNH, khs.ssNH, khs.aaNH, khs.tN, khs.dsN, khs.aaN, khs.sssN, khs.aasN, khs.ssssN, khs.sOH, khs.dO, khs.ssO, khs.dsssP, khs.sSH, khs.ssS, khs.aaS, khs.dssS, Kier1, Kier2, HybRatio, fragC, FME, ECCEN, SP.0, SP.1, SP.2, SP.3, SP.4, SP.5, SP.6, SP.7, VP.1, VP.2, VP.3, VP.4, VP.5, VP.6, VP.7, SPC.4, SPC.5, SPC.6, VPC.4, VPC.5, VPC.6, SC.3, SC.4, SC.5, SC.6, VC.3, VC.4, VC.5, VC.6, SCH.5, SCH.6, SCH.7, VCH.5, VCH.6, VCH.7, C1SP2, C2SP2, C3SP2, C1SP3, <b>C2SP3</b> , C3SP3, C4SP3, ATSp1, ATSp2, ATSp3, ATSp4, ATSp5, ATSm1, ATSm2, ATSm3, ATSm4, ATSm5, topoShape.1, <b>XLogP</b> , MW, LipinskiFailures, nRotB, MLogP, nAtomLAC, nAtomP, nAtomLC, nB, <b>nBase</b> , nAtom, nAromBond, naAromAtom, nAcid, nA, <b>nR</b> , nN, nD, nC, nF, nQ, nE, nG, nI, nP, nL, nK, nM, nS, nT, nY, nV, tpsaEfficiency.1, TopoPSA.1, nHBDOn, <b>nHBAcc</b> , bpol, apol. |
|----------------------------------------------------------------------------------------------------------------------------------------------------------------------------------------------------------------------------------------------------------------------------------------------------------------------------------------------------------------------------------------------------------------------------------------------------------------------------------------------------------------------------------------------------------------------------------------------------------------------------------------------------------------------------------------------------------------------------------------------------------------------------------------------------------------------------------------------------------------------------------------------------------------------------------------------------------------------------------------------------------------------------------------------------------------------------------------------------------------------------------------------------------------------------------------------------------------------------------------------------------------------------------------------------------------------------------------------------------------------------------------------------------------------------------------------------------------------------------------------------------------------------------------------------------------------------------------------------------------------------------------------------------------------------------------------------------------------------------------------------------------------------------------------------------------------------------------------------------------------------------------------------------------------------------------------------------------------------------------------------------------------------------------------------------------------------------------------------------------------------------------------------------------------------------------------------------------------------------------------------------------------------------------------------------------------------------------------------------------------------------------------------------------------------------------------------------------------------------------------------------------------------------------------------------------------------------------------------------------------------------------------------------------------------------------------------------------------------------------------------------------------------------------------------------------------------------------------------------------------------------------------------------------------------------------------------------------------------------------------------------------------------------------------------------------------------------------------------------------------------------------------------------------------------------------------------------------------------------------------------------------------------------------------------------------------------------------|

**Table S6.** The descriptor class and the definition of the MDs used in all proposed models.

| MDs              | Descriptor Class                             | Definition                                                                                                           |
|------------------|----------------------------------------------|----------------------------------------------------------------------------------------------------------------------|
| pKa1             | Physicochemical Descriptor                   | pka1 < pKa2 and it could be acidic and/or                                                                            |
| pKa2             | Physicochemical Descriptor                   | basic pKa                                                                                                            |
| logP             | Physicochemical Descriptor                   | The logarithm of the partition coefficient between n-octanol and water                                               |
| tpsaEfficiency   | Topological Descriptor                       | Polar surface area expressed as a ratio to molecular size.                                                           |
| MDEC.33          | Topological Descriptor                       | Molecular distance edge between all tertiary nitrogens                                                               |
| C2SP3            | Topological Descriptor                       | Characterizes the carbon connectivity in terms of hybridization C2SP3 singly bound carbon bound to two other carbons |
| XLogP            | Constitutional Descriptor                    | Prediction of logP based on the atom-type method called XLogP                                                        |
| MinPartialCharge | Electrostatic Descriptor                     | Min Partial Charge                                                                                                   |
| nBase            |                                              | Basic Group Count                                                                                                    |
| fr_NH1           | Fragment Descriptor                          | Number of Secondary amines                                                                                           |
| khs.sNH2         | Topological Descriptor                       | Counts the number of occurrences of the E-state fragments                                                            |
| nR               | Protein Descriptor Constitutional Descriptor | Returns the number of amino acids found in the system                                                                |
| nHBAcc           | Electronic Descriptor                        | Descriptor that calculates the number of hydrogen bond acceptors.                                                    |
